# Supplementary material for: Neighbourhood effects on obesity: scoping review of time-varying outcomes and exposures in longitudinal designs
Source: PubMed Central journal article supplement — BMJ Open. 2020 Mar 25;10(3):e034690. doi: 10.1136/bmjopen-2019-034690 (PMC7170601; doi:10.1136/bmjopen-2019-034690), 2020-03-25
Supplement: bmjopen-2019-034690supp001.pdf [file bmjopen-2019-034690supp001.pdf]

**SUPPLEMENTARY FILE TABLE OF CONTENT**

|                                                                 |    |
|-----------------------------------------------------------------|----|
| Supplementary File 1 : Sample Search Strategy .....             | 2  |
| Supplementary File 2 : Characteristics of selected studies..... | 4  |
| References .....                                                | 10 |

## SUPPLEMENTARY FILE 1 : SAMPLE SEARCH STRATEGY

Outcome terms AND longitudinal design terms AND (geographic context terms AND (social environment exposure terms OR physical environment exposure terms) )

| <b>Terms</b>                         | <b>Type*</b>     |
|--------------------------------------|------------------|
| <b>Outcome</b>                       |                  |
| 1 Obesity                            | MeSH:noexp, TIAB |
| 2 Obesity, Morbid                    | MeSH             |
| 3 Body Mass Index                    | MeSH, TIAB       |
| 4 BMI                                | TIAB             |
| 5 Overweight                         | MeSH:noexp, TIAB |
| 6 Weight                             | TIAB             |
| 7 Adiposity                          | TIAB             |
| <b>Longitudinal design</b>           |                  |
| 8 Cohort studies                     | MeSH             |
| 9 Prospective studies                | MeSH             |
| 10 Cohort*                           | TIAB             |
| 11 Follow up                         | TIAB             |
| 12 Longitudinal                      | TIAB             |
| 13 Retrospective                     | TIAB             |
| 14 Life course                       | TIAB             |
| 15 Randomized                        | TIAB             |
| 16 Change                            | TIAB             |
| 17 Experimental                      | TIAB             |
| 18 History                           | TIAB             |
| <b>Geographic context</b>            |                  |
| 19 Environment                       | MeSH:noexp       |
| 20 Residence characteristics         | MeSH:noexp       |
| 21 Neighborhood*                     | TIAB             |
| 22 Neighbourhood*                    | TIAB             |
| 23 Catchment Area (Health)           | MeSH             |
| 24 Residential                       | TIAB             |
| 25 Residence                         | TIAB             |
| 26 Context                           | TIAB             |
| 27 Composition                       | TIAB             |
| 28 Urban                             | TIAB             |
| <b>Social environment exposure</b>   |                  |
| 29 Sociological Factors              | MeSH:noexp, TIAB |
| 30 Socioeconomic Factors             | MeSH             |
| 31 Low-income                        | TIAB             |
| 32 Education                         | TIAB             |
| 33 Poverty                           | TIAB             |
| 34 Socioeconomic                     | TIAB             |
| 35 Income                            | TIAB             |
| 36 Social conditions                 | TIAB             |
| <b>Physical environment exposure</b> |                  |

---

|    |                        |            |
|----|------------------------|------------|
| 37 | Environment Design     | MeSH       |
| 38 | City Planning          | MeSH, TIAB |
| 39 | Food service           | MeSH       |
| 40 | Urban planning         | TIAB       |
| 41 | Built Environment      | TIAB       |
| 42 | Physical environment   | TIAB       |
| 43 | Urban form             | TIAB       |
| 44 | Obesogenic environment | TIAB       |

---

\*“Type” refers to the tags complementing search terms in queries. “MeSH” (Medical Subject Heading) terms will be searched in the controlled vocabulary assigned by U.S National Library of medicine to index scientific articles in its database. “MeSH:noexp” terms have the same function as MeSH, except that the search will be limited to the exact term not including subordinate terms generally linked to MeSH terms. “TIAB” terms will be searched in the title and abstract of the citations.

## SUPPLEMENTARY FILE 2 : CHARACTERISTICS OF SELECTED STUDIES

| Author, year of publication    | Country       | Target group           | Outcome             | Geographic unit       | Number of contextual measures | Number of outcome measures | Residential mobility | Change in neighborhood characteristics | Statistical analysis            | Result (summary) | Statistically significant associations by indicator type                                      |
|--------------------------------|---------------|------------------------|---------------------|-----------------------|-------------------------------|----------------------------|----------------------|----------------------------------------|---------------------------------|------------------|-----------------------------------------------------------------------------------------------|
| Albrecht, 2015 [1]             | United States | Migrants               | Waist circumference | Euclidean Buffer      | 1                             | 5                          | Both                 | No                                     | Multilevel model                | Null             | Food environment 0/4<br>Walkability 0/2<br>Physical activity establishment 0/2                |
| Arcaya, 2013 [2]               | United States | Adults                 | BMI                 | Euclidean Buffer      | 3.8                           | 3.8                        | Both                 | Yes                                    | Multilevel model                | Expected         | Foreclosure 1/1                                                                               |
| Auchincloss, 2012 [3]          | United States | Older adults           | BMI                 | Self-reported         | 1                             | 4                          | Both                 | No                                     | Proportional hazards regression | Mixed            | Food environment 1/1<br>Walkability 0/1                                                       |
| Auerbach, 2017 [4]             | United States | African American women | BMI                 | Self-reported         | 1                             | 2                          | Both                 | No                                     | Poisson regression analysis     | Expected         | Physical activity establishment 1/1<br>Food environment 0/1<br>Security 1/1                   |
| Barrientos-Gutierrez, 2017 [5] | United States | Older adults           | BMI                 | Euclidean Buffer      | 4                             | 5                          | Both                 | Yes                                    | Fixed effects model             | Null             | Food environment 0/2<br>Physical activity establishment 0/1<br>Walkability 0/1                |
| Berry, 2010 [6]                | Canada        | Adults                 | BMI                 | Census limits         | 1                             | 2                          | Both                 | No                                     | Linear regression               | Mixed            | Composite index socioeconomic 1/1<br>Walkability 0/1                                          |
| Berry, 2010 [7]                | Canada        | Adults                 | BMI                 | Administrative limits | 1                             | 2                          | Stayers              | No                                     | Ordinal regression              | Null             | Composite index socioeconomic 0/1<br>Walkability 0/1                                          |
| Block, 2011 [8]                | United States | Adults                 | BMI                 | Other                 | 7                             | 7                          | Both                 | Yes                                    | Multilevel model                | Null             | Food environment 5/36                                                                         |
| Blok, 2013 [9]                 | Netherlands   | Adults                 | BMI                 | Administrative limits | 1                             | 2                          | Both                 | No                                     | Multilevel model                | Expected         | Prevalence of health behavior 1/1                                                             |
| Boone-Heinonen, 2013 [10]      | United States | Young adults           | BMI                 | Euclidean Buffer      | 4                             | 4                          | Both                 | Yes                                    | Fixed effects model             | Null             | Food environment 1/3<br>Density 0/1<br>Deprivation 1/1<br>Physical activity establishment 0/2 |

| Author, year of publication | Country       | Target group           | Outcome             | Geographic unit       | Number of contextual measures | Number of outcome measures | Residential mobility | Change in neighborhood characteristics | Statistical analysis     | Result (summary) | Statistically significant associations by indicator type       |
|-----------------------------|---------------|------------------------|---------------------|-----------------------|-------------------------------|----------------------------|----------------------|----------------------------------------|--------------------------|------------------|----------------------------------------------------------------|
| Braun, 2016 [11]            | United States | Older adults           | Waist circumference | Other                 | 2                             | 2                          | Movers               | No                                     | Fixed effects model      | Null             | Walkability 0/1                                                |
| Braun, 2016 [12]            | United States | Young adults           | BMI and waist ratio | Other                 | 2                             | 2                          | Movers               | Yes                                    | Multiple                 | Null             | Walkability 0/1                                                |
| Brown, 2015 [13]            | United States | Adults                 | BMI                 | Euclidean Buffer      | 2                             | 2                          | Stayers              | Yes                                    | Linear regression        | Expected         | Transportation infrastructure 1/1                              |
| Burdette, 2012 [14]         | United States | Young adults           | BMI                 | Other                 | 1                             | 3                          | Both                 | No                                     | Structural equations     | Null             | Composite index socioeconomic 1/1<br>Perceived environment 0/2 |
| Christine, 2017 [15]        | United States | Adults                 | BMI                 | Euclidean Buffer      | 2                             | 2                          | Both                 | Yes                                    | Multiple                 | Null             | Foreclosure 0/1                                                |
| Colchero, 2008 [16]         | Philippines   | Women                  | BMI                 | Administrative limits | 1                             | 7                          | Both                 | No                                     | Multilevel model         | Expected         | Other 1/1<br>Density 1/1                                       |
| Coogan, 2010 [17]           | United States | African american women | BMI                 | Administrative limits | 6                             | 6                          | Both                 | No                                     | Multilevel model         | Expected         | Composite socioeconomic index 2/2                              |
| Coogan, 2011 [18]           | United States | African american women | BMI                 | Network buffer        | 3                             | 4                          | Both                 | No                                     | Multilevel model         | Expected         | Composite index built environment 2/2                          |
| Cummins, 2014 [19]          | United States | Adults                 | BMI                 | Administrative limits | 2                             | 2                          | Stayers              | Yes                                    | Difference in difference | Null             | Food environment 0/1                                           |
| Do, 2017 [20]               | United States | Adults                 | BMI                 | Administrative limits | 6                             | 6                          | Both                 | Yes                                    | Multiple                 | Null             | Deprivation 4/32                                               |
| Eid, 2008 [21]              | United States | Young adults           | BMI                 | Euclidean Buffer      | 4.1                           | 4.1                        | Both                 | No                                     | First difference         | Null             | Sprawl 0/2<br>Land use 0/2                                     |
| Feng, 2015 [22]             | Australia     | Adults                 | BMI                 | Census limits         | 1                             | 2.9                        | Stayers              | No                                     | Multilevel model         | Expected         | Composite index socioeconomic 1/1                              |
| Gebel, 2011 [23]            | Australia     | Adults                 | BMI                 | Other                 | 1                             | 2                          | Stayers              | No                                     | Linear regression        | Expected         | Perceived environment 1/1                                      |
| Gibson, 2011 [24]           | United States | Adults                 | BMI                 | Administrative limits | 3.3                           | 3.3                        | Both                 | Yes                                    | Fixed effects model      | Mixed            | Food environment 4/10                                          |

| Author, year of publication | Country       | Target group | Outcome             | Geographic unit  | Number of contextual measures | Number of outcome measures | Residential mobility | Change in neighborhood characteristics | Statistical analysis           | Result (summary) | Statistically significant associations by indicator type                             |
|-----------------------------|---------------|--------------|---------------------|------------------|-------------------------------|----------------------------|----------------------|----------------------------------------|--------------------------------|------------------|--------------------------------------------------------------------------------------|
| Halonen, 2014 [25]          | Finland       | Profession   | BMI                 | Other            | 2                             | 2                          | Stratified           | No                                     | Multilevel model               | Mixed            | Blue and green area 3/8                                                              |
| Hirsch, 2014 [26]           | United States | Older adults | BMI and waist ratio | Euclidean Buffer | 5                             | 5                          | Both                 | Yes                                    | Fixed effects model            | Null             | Composite built environment 2/6                                                      |
| Jones, 2014 [27]            | United States | Adults       | BMI and waist ratio | Census limits    | 1                             | 2                          | Both                 | No                                     | Multilevel model               | Mixed            | Composite index socioeconomic 1/2                                                    |
| Joost, 2016 [28]            | Switzerland   | Adults       | BMI                 | Census limits    | 2                             | 2                          | Both                 | No                                     | Spatial analysis               | Expected         | Deprivation 1/1                                                                      |
| Kapinos, 2014 [29]          | United States | Students     | BMI                 | Other            | 1                             | 2                          | Both                 | No                                     | Linear regression              | Mixed            | Food environment ¼<br>Physical activity establishment 2/2                            |
| Kimbrow, 2017 [30]          | United States | Adults       | BMI                 | Census limits    | 2                             | 2                          | Both                 | Yes                                    | Multilevel model               | Null             | Deprivation 0/2<br>Food environment 0/6                                              |
| Kwarteng, 2017 [31]         | United States | Adults       | Waist circumference | Census limits    | 1                             | 2                          | Both                 | No                                     | Multilevel model               | Expected         | Deprivation 1/1                                                                      |
| Kwarteng, 2016 [32]         | United States | Adults       | Waist circumference | Census limits    | 1                             | 2                          | Both                 | No                                     | Multilevel model               | Expected         | Deprivation 1/1                                                                      |
| Lamb, 2017 [33]             | Australia     | Women        | BMI                 | Network buffer   | 2                             | 3                          | Stayers              | Yes                                    | Multilevel model               | Null             | Food environment 0/1                                                                 |
| Laraia, 2017[34]            | United States | Diabetes     | BMI                 | Census limits    | 5                             | 17                         | Stratified           | Yes                                    | Fixed effects model            | Mixed            | Food environment 2/4                                                                 |
| Lee, 2017 [35]              | United States | Adults       | Other               | Census limits    | 1                             | 2                          | Both                 | No                                     | Linear and logistic regression | Expected         | Transportation 1/1<br>Greenspace 1/1 Inverse<br>Land use 0/1<br>Food environment 5/5 |
| Leonard, 2017 [36]          | United States | Adults       | BMI                 | Euclidean Buffer | 2                             | 2                          | Stratified           | Yes                                    | Multilevel model               | Expected         | Composite index socioeconomic 3/3                                                    |
| Li, 2009 [37]               | United States | Older adults | BMI and waist ratio | Census limits    | 1                             | 2                          | Both                 | No                                     | Multilevel model               | Null             | Food environment 0/1<br>Walkability 0/1                                              |
| Lippert, 2017 [38]          | United States | Young adults | BMI and waist ratio | Census limits    | 2                             | 1                          | Both                 | Yes                                    | Logistic regression            | Null             | Deprivation 3/12                                                                     |

| Author, year of publication | Country       | Target group                       | Outcome             | Geographic unit  | Number of contextual measures | Number of outcome measures | Residential mobility | Change in neighborhood characteristics | Statistical analysis | Result (summary) | Statistically significant associations by indicator type                                                         |
|-----------------------------|---------------|------------------------------------|---------------------|------------------|-------------------------------|----------------------------|----------------------|----------------------------------------|----------------------|------------------|------------------------------------------------------------------------------------------------------------------|
| Ludwig, 2011 [39]           | United States | Women                              | BMI                 | Census limits    | 2                             | 1                          | Both                 | No                                     | Logistic regression  | Expected         | Deprivation 1/1                                                                                                  |
| Mendez, 2016 [40]           | United States | Participants in weightloss program | Weight              | Census limits    | 1                             | 2                          | Both                 | No                                     | Fixed effects model  | Null             | Food environment 0/2<br>Racial composition 1/1<br>Deprivation 0/4                                                |
| Meyer, 2015 [41]            | United States | Adults                             | BMI                 | Network buffer   | 4                             | 4                          | Both                 | Yes                                    | Multilevel model     | Mixed            | Composite index built environment 1/2                                                                            |
| Mujahid, 2005 [42]          | United States | Older adults                       | BMI                 | Census limits    | 1                             | 4                          | Both                 | No                                     | Multilevel model     | Null             | Composite index socioeconomic 0/4                                                                                |
| Murray, 2010 [43]           | United States | Older adults                       | BMI                 | Census limits    | 20                            | 1                          | Both                 | Yes                                    | Linear regression    | Expected         | Deprivation 1/1                                                                                                  |
| Picavet, 2016 [44]          | Netherlands   | Adults                             | BMI                 | Euclidean Buffer | 4                             | 4                          | Both                 | Yes                                    | Multiple             | Null             | Green space 4/30                                                                                                 |
| Pitts, 2017 [45]            | United States | Rural adults                       | Weight              | Other            | 1                             | 2                          | Both                 | No                                     | Linear regression    | Null             | Food environment 1/10<br>Physical activity establishment 0/6<br>Walkability 0/1<br>Security 0/1<br>Perceived 0/1 |
| Powell-Wiley, 2014 [46]     | United States | Adults                             | Weight              | Census limits    | 2                             | 2                          | Stayers              | No                                     | Multilevel model     | Mixed            | Composite index socioeconomic 1/2                                                                                |
| Powell-Wiley, 2015 [47]     | United States | Adults                             | BMI                 | Census limits    | 2                             | 2                          | Stratified           | No                                     | Multilevel model     | Expected         | Composite index socioeconomic 3/3                                                                                |
| Powell-Wiley, 2017 [48]     | United States | Older adults                       | BMI and waist ratio | Other            | 5                             | 5                          | Both                 | Yes                                    | Multiple             | Null             | Perceived environment 2/18<br>Security 0/18                                                                      |
| Rachele, 2017 [49]          | Australia     | Older adults                       | BMI                 | Census limits    | 1                             | 4                          | Stayers              | No                                     | Multilevel model     | Null             | Composite index socioeconomic 0/2                                                                                |
| Richardson, 2015 [50]       | United States | Adults                             | BMI                 | Other            | 3                             | 3                          | Both                 | Yes                                    | Structural equation  | Mixed            | Food environment 1/2                                                                                             |
| Richardson, 2017 [51]       | United States | African american                   | BMI                 | Euclidean Buffer | 1                             | 1                          | Both                 | Yes                                    | Structural equation  | Expected         | Perceived environment 1/1<br>Security 1/1                                                                        |

| Author, year of publication | Country        | Target group           | Outcome             | Geographic unit       | Number of contextual measures | Number of outcome measures | Residential mobility | Change in neighborhood characteristics | Statistical analysis           | Result (summary) | Statistically significant associations by indicator type                                                                                |
|-----------------------------|----------------|------------------------|---------------------|-----------------------|-------------------------------|----------------------------|----------------------|----------------------------------------|--------------------------------|------------------|-----------------------------------------------------------------------------------------------------------------------------------------|
| Ruel, 2010 [52]             | United States  | Women                  | BMI                 | Census limits         | 1                             | 4                          | Both                 | No                                     | Multilevel model               | Mixed            | Composite index socioeconomic 0/1<br>Racial composition 1/1 Inverse                                                                     |
| Rummo, 2017 [53]            | United States  | Adults                 | BMI                 | Network buffer        | 6                             | 6                          | Both                 | Yes                                    | Multiple                       | Null             | Food environment 2/7                                                                                                                    |
| Sarkar, 2013 [54]           | United Kingdom | Older adults           | BMI                 | Network buffer        | 1                             | 3                          | Both                 | No                                     | Multilevel model               | Mixed            | Land use 2/6<br>Green space 0/1<br>Physical activity establishment 1/1<br>Transportation infrastructure 2/4<br>Other 1/1<br>Density 1/1 |
| Sheehan, 2017 [55]          | United States  | Women                  | BMI                 | Census limits         | 2                             | 1                          | Both                 | Yes                                    | Logistic regression            | Expected         | Deprivation 1/1                                                                                                                         |
| Stafford, 2010 [56]         | United Kingdom | Profession             | BMI                 | Census limits         | 1                             | 3                          | Stratified           | No                                     | Multilevel model               | Null             | Composite index socioeconomic ¼                                                                                                         |
| Stoddard, 2013 [57]         | United States  | Patients with diabetes | BMI                 | Census limits         | 1                             | 2                          | Both                 | No                                     | Linear and logistic regression | Expected         | Composite index socioeconomic 3/3                                                                                                       |
| Sugiyama, 2016 [58]         | Australia      | Adults                 | Waist circumference | Network buffer        | 1                             | 2                          | Stayers              | No                                     | Multilevel model               | Expected         | Distance to landmark 2/2<br>Walkability 0/1                                                                                             |
| Sund, 2010 [59]             | Norway         | Adults                 | BMI                 | Census limits         | 1                             | 2                          | Stayers              | No                                     | Multilevel model               | Null             | Deprivation 0/1                                                                                                                         |
| Wasfi, 2016 [60]            | Canada         | Adults                 | BMI                 | Administrative limits | 7                             | 7                          | Both                 | No                                     | Multiple                       | Expected         | Walkability 1/1                                                                                                                         |
| Xiao, 2017 [61]             | United States  | Older adults           | BMI                 | Census limits         | 1                             | 2                          | Both                 | No                                     | Logistic regression            | Expected         | Composite index socioeconomic 4/4                                                                                                       |
| Xu, 2013 [62]               | China          | Adults                 | BMI and waist ratio | Administrative limits | 4                             | 4                          | Both                 | Yes                                    | Multilevel model               | Null             | Food environment 13/48                                                                                                                  |
| Zenk, 2017 [63]             | United States  | Adults                 | BMI                 | Euclidean Buffer      | 2                             | 2                          | Stayers              | Yes                                    | Multilevel model               | Null             | Food environment 1/6                                                                                                                    |
| Zenk, 2017 [64]             | United States  | Veterans               | BMI                 | Euclidean Buffer      | 6                             | 6                          | Stratified           | Yes                                    | Fixed effects model            | Mixed            | Food environment 17/48                                                                                                                  |



| Author, year of publication | Country       | Target group                        | Outcome | Geographic unit | Number of contextual measures | Number of outcome measures | Residential mobility | Change in neighborhood characteristics | Statistical analysis | Result (summary) | Statistically significant associations by indicator type                                          |
|-----------------------------|---------------|-------------------------------------|---------|-----------------|-------------------------------|----------------------------|----------------------|----------------------------------------|----------------------|------------------|---------------------------------------------------------------------------------------------------|
| Zhang, 2016 [65]            | United States | Diabetes                            | BMI     | Network buffer  | 1                             | 2                          | Stayers              | Yes                                    | First difference     | Null             | Food environment 0/1                                                                              |
| Zhao, 2014 [66]             | United States | African-American and Hispanic women | BMI     | Census limits   | 2                             | 1                          | Both                 | No                                     | Linear regression    | Null             | Food environment 0/20<br>Racial composition 0/2<br>Deprivation 4/8<br>Security 0/4<br>Density 0/2 |

## REFERENCES

1. Albrecht, S.S., et al., *Change in waist circumference with longer time in the United States among Hispanic and Chinese immigrants: the modifying role of the neighborhood built environment*. *Ann Epidemiol*, 2015. **25**(10): p. 767-72.e2.
2. Arcaya, M., et al., *Effects of proximate foreclosed properties on individuals' weight gain in Massachusetts, 1987-2008*. *American journal of public health*, 2013. **103**(9): p. e50-56.
3. Auchincloss, A.H., et al., *Neighborhood Health-Promoting Resources and Obesity Risk (the Multi-Ethnic Study of Atherosclerosis)*. *Obesity*, 2012.
4. Auerbach, B.J., et al., *Factors associated with maintenance of body mass index in the Jackson Heart Study: A prospective cohort study secondary analysis*. *Preventive Medicine*, 2017. **100**: p. 95-100.
5. Barrientos-Gutierrez, T., et al., *Neighborhood Physical Environment and Changes in Body Mass Index: Results From the Multi-Ethnic Study of Atherosclerosis*. *Am J Epidemiol*, 2017. **186**(11): p. 1237-1245.
6. Berry, T.R., et al., *A longitudinal and cross-sectional examination of the relationship between reasons for choosing a neighbourhood, physical activity and body mass index*. *International Journal of Behavioral Nutrition and Physical Activity*, 2010. **7**.
7. Berry, T.R., et al., *Changes in BMI over 6 years: the role of demographic and neighborhood characteristics*. *International Journal of Obesity*, 2010. **34**(8): p. 1275-1283.
8. Block, J.P., et al., *Proximity to food establishments and body mass index in the Framingham Heart Study offspring cohort over 30 years*. *Am J Epidemiol*, 2011. **174**(10): p. 1108-14.
9. Blok, D.J., et al., *Changes in smoking, sports participation and overweight: Does neighborhood prevalence matter?* *Health & Place*, 2013. **23**: p. 33-38.
10. Boone-Heinonen, J., et al., *The Neighborhood Energy Balance Equation: Does Neighborhood Food Retail Environment plus Physical Activity Environment = Obesity? The CARDIA Study*. *Plos One*, 2013. **8**(12).
11. Braun, L.M., et al., *Walkability and cardiometabolic risk factors: Cross-sectional and longitudinal associations from the Multi-Ethnic Study of Atherosclerosis*. *Health & Place*, 2016. **39**: p. 9-17.
12. Braun, L.M., et al., *Changes in walking, body mass index, and cardiometabolic risk factors following residential relocation: Longitudinal results from the CARDIA study*. *J Transp Health*, 2016. **3**(4): p. 426-439.
13. Brown, B.B., et al., *Transit Use, Physical Activity, and Body Mass Index Changes: Objective Measures Associated With Complete Street Light-Rail Construction*. *American Journal of Public Health*, 2015. **105**(7): p. 1468-1474.
14. Burdette, A.M. and B.L. Needham, *Neighborhood environment and body mass index trajectories from adolescence to adulthood*. *J Adolesc Health*, 2012. **50**(1): p. 30-7.
15. Christine, P.J., et al., *Exposure to Neighborhood Foreclosures and Changes in Cardiometabolic Health: Results From MESA*. *American Journal of Epidemiology*, 2017. **185**(2): p. 106-114.
16. Colchero, M.A. and D. Bishai, *Effect of neighborhood exposures on changes in weight among women in Cebu, Philippines (1983-2002)*. *American Journal of Epidemiology*, 2008. **167**(5): p. 615-623.
17. Coogan, P.F., et al., *Neighborhood Socioeconomic Status in Relation to 10-Year Weight Gain in the Black Women's Health Study*. *Obesity*, 2010. **18**(10): p. 2064-2065.
18. Coogan, P.F., et al., *Longitudinal assessment of urban form and weight gain in African-American women*. *Am J Prev Med*, 2011. **40**(4): p. 411-8.
19. Cummins, S., E. Flint, and S.A. Matthews, *New Neighborhood Grocery Store Increased Awareness Of Food Access But Did Not Alter Dietary Habits Or Obesity*. *Health Affairs*, 2014. **33**(2): p. 283-291.
20. Do, D.P. and C. Zheng, *A marginal structural modeling strategy investigating short and long-term exposure to neighborhood poverty on BMI among US black and white adults*. *Health & Place*, 2017. **46**: p. 201-209.
21. Eid, J., et al., *Fat city: Questioning the relationship between urban sprawl and obesity*. *Journal of Urban Economics*, 2008. **63**(2): p. 385-404.
22. Feng, X.Q. and A. Wilson, *Getting Bigger, Quicker? Gendered Socioeconomic Trajectories in Body Mass Index across the Adult Lifecourse: A Longitudinal Study of 21,403 Australians*. *Plos One*, 2015. **10**(10).
23. Gebel, K., et al., *Mismatch between perceived and objectively assessed neighborhood walkability attributes: Prospective relationships with walking and weight gain*. *Health & Place*, 2011. **17**(2): p. 519-524.
24. Gibson, D.M., *The neighborhood food environment and adult weight status: estimates from longitudinal data*. *Am J Public Health*, 2011. **101**(1): p. 71-8.

25. Halonen, J.I., et al., *Green and Blue Areas as Predictors of Overweight and Obesity in an 8-Year Follow-Up Study*. *Obesity*, 2014. **22**(8): p. 1910-1917.
26. Hirsch, J.A., et al., *Built environment change and change in BMI and waist circumference: Multi-ethnic Study of Atherosclerosis*. *Obesity* (Silver Spring), 2014. **22**(11): p. 2450-7.
27. Jones, M. and J. Huh, *Toward a multidimensional understanding of residential neighborhood: a latent profile analysis of Los Angeles neighborhoods and longitudinal adult excess weight*. *Health Place*, 2014. **27**: p. 134-41.
28. Joost, S., et al., *Persistent spatial clusters of high body mass index in a Swiss urban population as revealed by the 5-year GeoCoLaus longitudinal study*. *BMJ Open*, 2016. **6**(1): p. e010145.
29. Kapinos, K.A., O. Yakusheva, and D. Eisenberg, *Obesogenic environmental influences on young adults: Evidence from college dormitory assignments*. *Economics & Human Biology*, 2014. **12**: p. 98-109.
30. Kimbro, R.T., G. Sharp, and J.T. Denney, *Home and away: Area socioeconomic disadvantage and obesity risk*. *Health Place*, 2017. **44**: p. 94-102.
31. Kwarteng, J.L., et al., *Independent Effects of Neighborhood Poverty and Psychosocial Stress on Obesity Over Time*. *Journal of Urban Health*, 2017. **94**(6): p. 791-802.
32. Kwarteng, J.L., et al., *NEIGHBOURHOOD POVERTY, PERCEIVED DISCRIMINATION AND CENTRAL ADIPOSITY IN THE USA: INDEPENDENT ASSOCIATIONS IN A REPEATED MEASURES ANALYSIS*. *J Biosoc Sci*, 2016. **48**(6): p. 709-22.
33. Lamb, K.E., et al., *Associations between major chain fast-food outlet availability and change in body mass index: a longitudinal observational study of women from Victoria, Australia*. *Bmj Open*, 2017. **7**(10).
34. Laraia, B.A., et al., *Food Environment and Weight Change: Does Residential Mobility Matter?: The Diabetes Study of Northern California (DISTANCE)*. *Am J Epidemiol*, 2017. **185**(9): p. 743-750.
35. Lee, J.J., et al., *Association of built environment characteristics with adiposity and glycaemic measures*. *Obesity Science & Practice*, 2017. **3**(3): p. 333-341.
36. Leonard, T., et al., *Do neighborhoods matter differently for movers and non-movers? Analysis of weight gain in the longitudinal dallas heart study*. *Health & Place*, 2017. **44**: p. 52-60.
37. Li, F., et al., *Built Environment and 1-Year Change in Weight and Waist Circumference in Middle-Aged and Older Adults*. *American Journal of Epidemiology*, 2009. **169**(4): p. 401-408.
38. Lippert, A.M., et al., *Associations of Continuity and Change in Early Neighborhood Poverty With Adult Cardiometabolic Biomarkers in the United States: Results From the National Longitudinal Study of Adolescent to Adult Health, 1995-2008*. *Am J Epidemiol*, 2017: p. 1-12.
39. Ludwig, J., et al., *Neighborhoods, obesity, and diabetes--a randomized social experiment*. *N Engl J Med*, 2011. **365**(16): p. 1509-19.
40. Mendez, D.D., et al., *Neighborhood factors and six-month weight change among overweight individuals in a weight loss intervention*. *Prev Med Rep*, 2016. **4**: p. 569-573.
41. Meyer, K.A., et al., *Combined measure of neighborhood food and physical activity environments and weight-related outcomes: The CARDIA study*. *Health & Place*, 2015. **33**: p. 9-18.
42. Mujahid, M.S., et al., *Cross-sectional and longitudinal associations of BMI with socioeconomic characteristics*. *Obesity Research*, 2005. **13**(8): p. 1412-1421.
43. Murray, E.T., et al., *Trajectories of neighborhood poverty and associations with subclinical atherosclerosis and associated risk factors: the multi-ethnic study of atherosclerosis*. *American journal of epidemiology*, 2010. **171**(10): p. 1099-1108.
44. Picavet, H.S., et al., *Greener living environment healthier people?: Exploring green space, physical activity and health in the Doetinchem Cohort Study*. *Prev Med*, 2016. **89**: p. 7-14.
45. Pitts, S.B.J., et al., *Examining the Association between Intervention-Related Changes in Diet, Physical Activity, and Weight as Moderated by the Food and Physical Activity Environments among Rural, Southern Adults*. *Journal of the Academy of Nutrition and Dietetics*, 2017. **117**(10): p. 1618-1627.
46. Powell-Wiley, T.M., et al., *Neighborhood-level socioeconomic deprivation predicts weight gain in a multi-ethnic population: longitudinal data from the Dallas Heart Study*. *Prev Med*, 2014. **66**: p. 22-7.
47. Powell-Wiley, T.M., et al., *Change in Neighborhood Socioeconomic Status and Weight Gain Dallas Heart Study*. *American Journal of Preventive Medicine*, 2015. **49**(1): p. 72-79.
48. Powell-Wiley, T.M., et al., *Associations of Neighborhood Crime and Safety and With Changes in Body Mass Index and Waist Circumference The Multi-Ethnic Study of Atherosclerosis*. *American Journal of Epidemiology*, 2017. **186**(3): p. 280-288.

49. Rachele, J.N., et al., *Neighborhood socioeconomic disadvantage and body mass index among residentially stable mid-older aged adults: Findings from the HABITAT multilevel longitudinal study*. *Prev Med*, 2017. **105**: p. 271-274.
50. Richardson, A.S., et al., *Multiple pathways from the neighborhood food environment to increased body mass index through dietary behaviors: A structural equation-based analysis in the CARDIA study*. *Health & Place*, 2015. **36**: p. 74-87.
51. Richardson, A.S., et al., *Pathways through which higher neighborhood crime is longitudinally associated with greater body mass index*. *International Journal of Behavioral Nutrition and Physical Activity*, 2017. **14**.
52. Ruel, E., et al., *Neighborhood effects on BMI trends: examining BMI trajectories for Black and White women*. *Health Place*, 2010. **16**(2): p. 191-8.
53. Rummo, P.E., et al., *Does unmeasured confounding influence associations between the retail food environment and body mass index over time? The Coronary Artery Risk Development in Young Adults (CARDIA) study*. *International Journal of Epidemiology*, 2017. **46**(5): p. 1456-1464.
54. Sarkar, C., J. Gallacher, and C. Webster, *Built environment configuration and change in body mass index: the Caerphilly Prospective Study (CaPS)*. *Health Place*, 2013. **19**: p. 33-44.
55. Sheehan, C.M., et al., *Long-term neighborhood poverty trajectories and obesity in a sample of california mothers*. *Health Place*, 2017. **46**: p. 49-57.
56. Stafford, M., et al., *Deprivation and the Development of Obesity A Multilevel, Longitudinal Study in England*. *American Journal of Preventive Medicine*, 2010. **39**(2): p. 130-139.
57. Stoddard, P.J., et al., *Neighborhood Deprivation and Change in BMI Among Adults With Type 2 Diabetes*. *Diabetes Care*, 2013. **36**(5): p. 1200-1208.
58. Sugiyama, T., et al., *Residential proximity to urban centres, local-area walkability and change in waist circumference among Australian adults*. *Prev Med*, 2016. **93**: p. 39-45.
59. Sund, E.R., A. Jones, and K. Midtjell, *Individual, family, and area predictors of BMI and BMI change in an adult Norwegian population: Findings from the HUNT study*. *Social Science and Medicine*, 2010. **70**(8): p. 1194-1202.
60. Wasfi, R.A., et al., *Neighborhood Walkability and Body Mass Index Trajectories: Longitudinal Study of Canadians*. *Am J Public Health*, 2016. **106**(5): p. 934-40.
61. Xiao, Q., et al., *Neighborhood Socioeconomic Deprivation and Weight Change in a Large US Cohort*. *American Journal of Preventive Medicine*, 2017. **52**(6): p. E173-E181.
62. Xu, H., S.E. Short, and T. Liu, *Dynamic relations between fast-food restaurant and body weight status: a longitudinal and multilevel analysis of Chinese adults*. *J Epidemiol Community Health*, 2013. **67**(3): p. 271-9.
63. Zenk, S.N., et al., *Longitudinal Associations Between Observed and Perceived Neighborhood Food Availability and Body Mass Index in a Multiethnic Urban Sample*. *Health Educ Behav*, 2017. **44**(1): p. 41-51.
64. Zenk, S.N., et al., *Geographic Accessibility Of Food Outlets Not Associated With Body Mass Index Change Among Veterans, 2009-14*. *Health Affairs*, 2017. **36**(8): p. 1433-1442.
65. Zhang, Y.T., et al., *Is a reduction in distance to nearest supermarket associated with BMI change among type 2 diabetes patients?* *Health & Place*, 2016. **40**: p. 15-20.
66. Zhao, Z.X., R. Kaestner, and X. Xu, *Spatial mobility and environmental effects on obesity*. *Economics & Human Biology*, 2014. **14**: p. 128-140.
